# Supplementary material
Source: MDPI journal article supplement (https://www.mdpi.com/1999-4907/14/2/436)
Supplement: s1 [file s1]

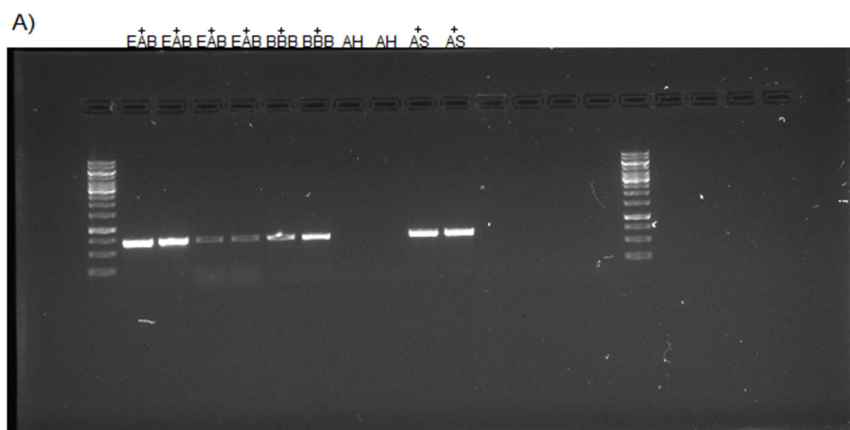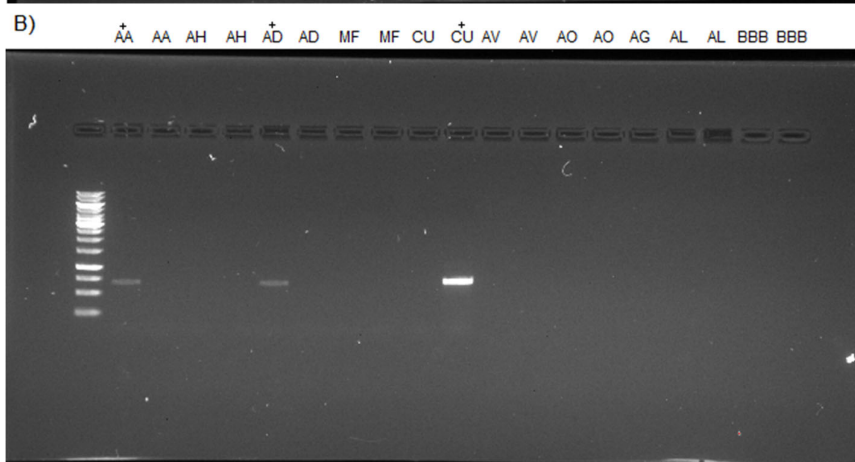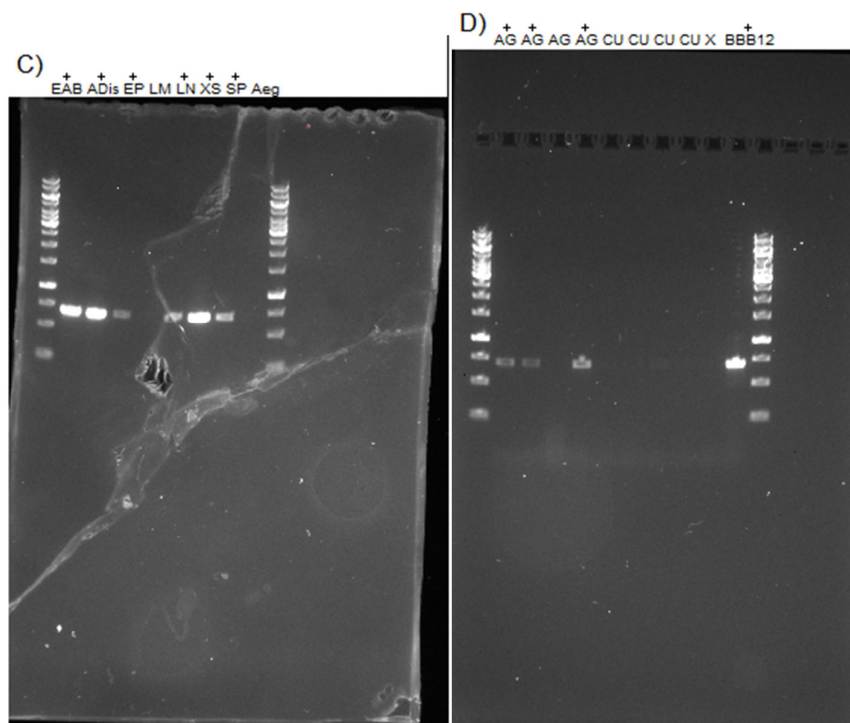

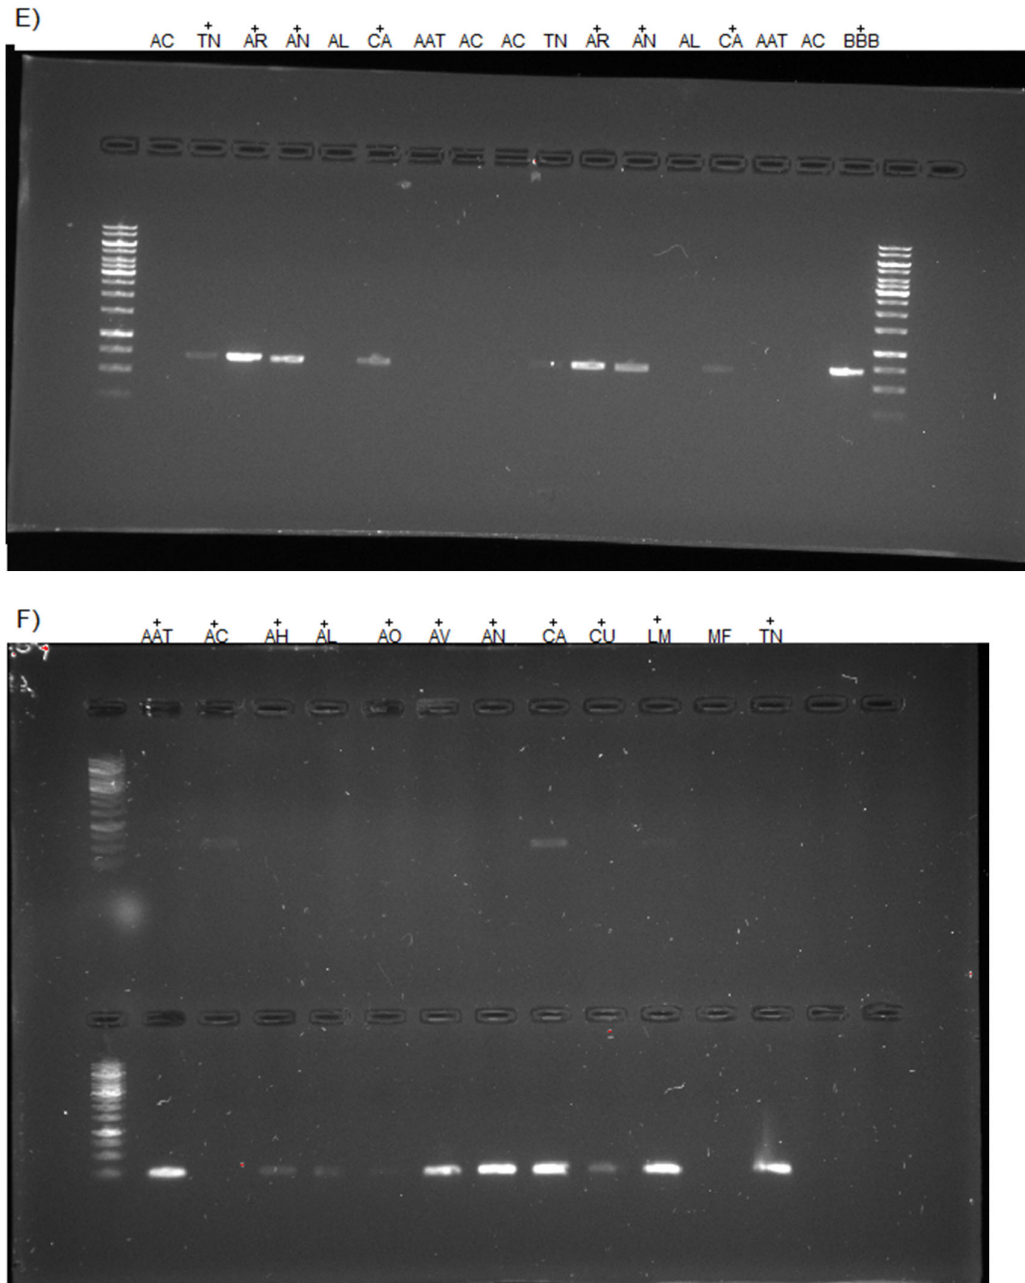

**Figure 1.** Gels of amplified PCR DNA of insects used for specific testing of EAB LAMP primers. All primers used to confirm DNA were LCO1490-HCO2198 (A-E) in gel except the final gel (F) shows DNA amplified with 28S\_D1D2.3.a\_up-28S\_D1D2.3.a\_low (Top) and rrnl mtDNA (16A)-rrnl mtDNA (16B) (Bottom). Species with plus mark(+) were considered amplified. See Table 1 for the species codes.
